# Supplementary material for: Technology Acceptance and Information System Success of a Mobile Electronic Platform for Nonphysician Clinical Students in Zambia: Prospective, Nonrandomized Intervention Study
Source: PubMed Central journal article supplement (PMC6914109; doi:10.2196/14748), 2019-10-09
Supplement: jmir_v21i10e14748_app1.pdf [file jmir_v21i10e14748_app1.pdf]

**Appendix 1: Questionnaire for medical licentiate practitioner students comprising demographic data and prior technological experience.**

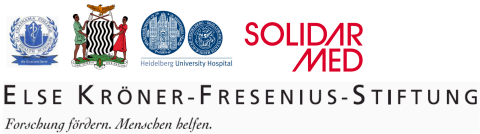

Participants Demographics:  
Medical E-Learning MLP Students  
Version 0.2, 10<sup>th</sup> July 2016

**Participant Details**

We will not be sharing information about you to anyone outside of the research team. The information that we collect from this research project will be kept private. Only the researchers will have access to this information and information is locked up. Any information collected will not be shared with or given to anyone except the researchers involved in the research.

| Participant Details                                                                                     |                                                                                                                                                                                                          |
|---------------------------------------------------------------------------------------------------------|----------------------------------------------------------------------------------------------------------------------------------------------------------------------------------------------------------|
| First Name:                                                                                             |                                                                                                                                                                                                          |
| Last Name:                                                                                              |                                                                                                                                                                                                          |
| Date:                                                                                                   |                                                                                                                                                                                                          |
| Place:                                                                                                  |                                                                                                                                                                                                          |
| DOB:                                                                                                    |                                                                                                                                                                                                          |
| Gender:                                                                                                 |                                                                                                                                                                                                          |
| Marital Status                                                                                          |                                                                                                                                                                                                          |
| Which study year?                                                                                       | <input type="checkbox"/> 2 <sup>nd</sup> <input type="checkbox"/> 3 <sup>rd</sup> <input type="checkbox"/> 4 <sup>th</sup> <input type="checkbox"/> Bridging                                             |
| What did you study before joining the ML programme?                                                     |                                                                                                                                                                                                          |
| Which year did you graduate as Clinical Officer?                                                        |                                                                                                                                                                                                          |
| How many years of uninterrupted medical practise do you have?                                           |                                                                                                                                                                                                          |
| Do you have a technical device available for your own usage?                                            | <input type="checkbox"/> Laptop <input type="checkbox"/> Workstation<br><input type="checkbox"/> Tablet <input type="checkbox"/> No device<br><input type="checkbox"/> Else:                             |
| ➤ If yes, do you use your technical device for medical learning within the ML programme?                | <input type="checkbox"/> Yes <input type="checkbox"/> No <input type="checkbox"/> Else:                                                                                                                  |
| ➤ If yes, how often do you use the technical device available to you for learning for the ML programme? | <input type="checkbox"/> A few times per month <input type="checkbox"/> Every other week<br><input type="checkbox"/> Once a week <input type="checkbox"/> Every other day <input type="checkbox"/> Daily |

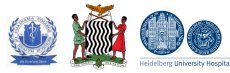

**SOLIDAR  
MED**

**ELSE KRÖNER-FRESENIUS-STIFTUNG**

*Forschung fördern. Menschen helfen.*

Participants Demographics:  
Medical E-Learning MLP Students  
Version 0.2, 10<sup>th</sup> July 2016

|                                                                                                                       |                                                                                                                                                                                                                                       |
|-----------------------------------------------------------------------------------------------------------------------|---------------------------------------------------------------------------------------------------------------------------------------------------------------------------------------------------------------------------------------|
| How would you, as objectively as possible, see yourself using technical devices like computers, tablets, smartphones? | <input type="checkbox"/> With great ease<br><input type="checkbox"/> Comfortable in using<br><input type="checkbox"/> Okay<br><input type="checkbox"/> Not really comfortable<br><input type="checkbox"/> I hardly can use them       |
| How would you, as objectively as possible, see yourself navigating through the Internet?                              | <input type="checkbox"/> With great ease<br><input type="checkbox"/> Comfortable in using<br><input type="checkbox"/> Okay<br><input type="checkbox"/> Not really comfortable<br><input type="checkbox"/> I hardly can use a computer |
| Have you participated in an e-learning class or participated in an online learning course?                            | <input type="checkbox"/> Yes <input type="checkbox"/> No <input type="checkbox"/> Else:                                                                                                                                               |
| ➤ If yes, what kind of e-learning class was it?                                                                       |                                                                                                                                                                                                                                       |
| ➤ If yes, how would you describe your experience with the e-learning (positive, beneficial, not helpful etc.)?        |                                                                                                                                                                                                                                       |
| Do you think e-learning could be useful to you within the ML program?                                                 | <input type="checkbox"/> Yes <input type="checkbox"/> No <input type="checkbox"/> Else:                                                                                                                                               |
| What contents and materials would you like to find on the ML e-learning platform?                                     |                                                                                                                                                                                                                                       |
